# Supplementary material for: The lipid peroxidation product 4-hydroxynonenal contributes to oxidative stress-mediated deterioration of the ageing oocyte
Source: PubMed Central journal article supplement (PMC5524799; doi:10.1038/s41598-017-06372-z), 2017-07-24
Supplement: 41598_2017_6372_MOESM1_ESM.pdf [file 41598_2017_6372_MOESM1_ESM.pdf]

## **The lipid peroxidation product 4-hydroxynonenal contributes to oxidative stress-mediated deterioration of the ageing oocyte**

\*Bettina P. Mihalas<sup>1</sup>, Geoffry N. De Iuliis<sup>1</sup>, Kate. A. Redgrove<sup>1</sup>, Eileen A. McLaughlin<sup>1,2</sup>,

\*Brett Nixon<sup>1</sup>

*1. Priority Research Centre for Reproductive Science, School of Environmental and Life Sciences, University of Newcastle, Callaghan, New South Wales, Australia*

*2. School of Biological Sciences, University of Auckland, Auckland, New Zealand*

### **\*Corresponding Author(s):**

Ms. Bettina Mihalas

Professor Brett Nixon

Priority Research Centre for Reproductive Science

School of Environmental and Life Sciences

The University of Newcastle, University Drive, Callaghan, NSW, 2308

T: +612 4921 6977

F: +612 4921 6308

E: Bettina.Mihalas@uon.edu, Brett.Nixon@newcastle.edu.au

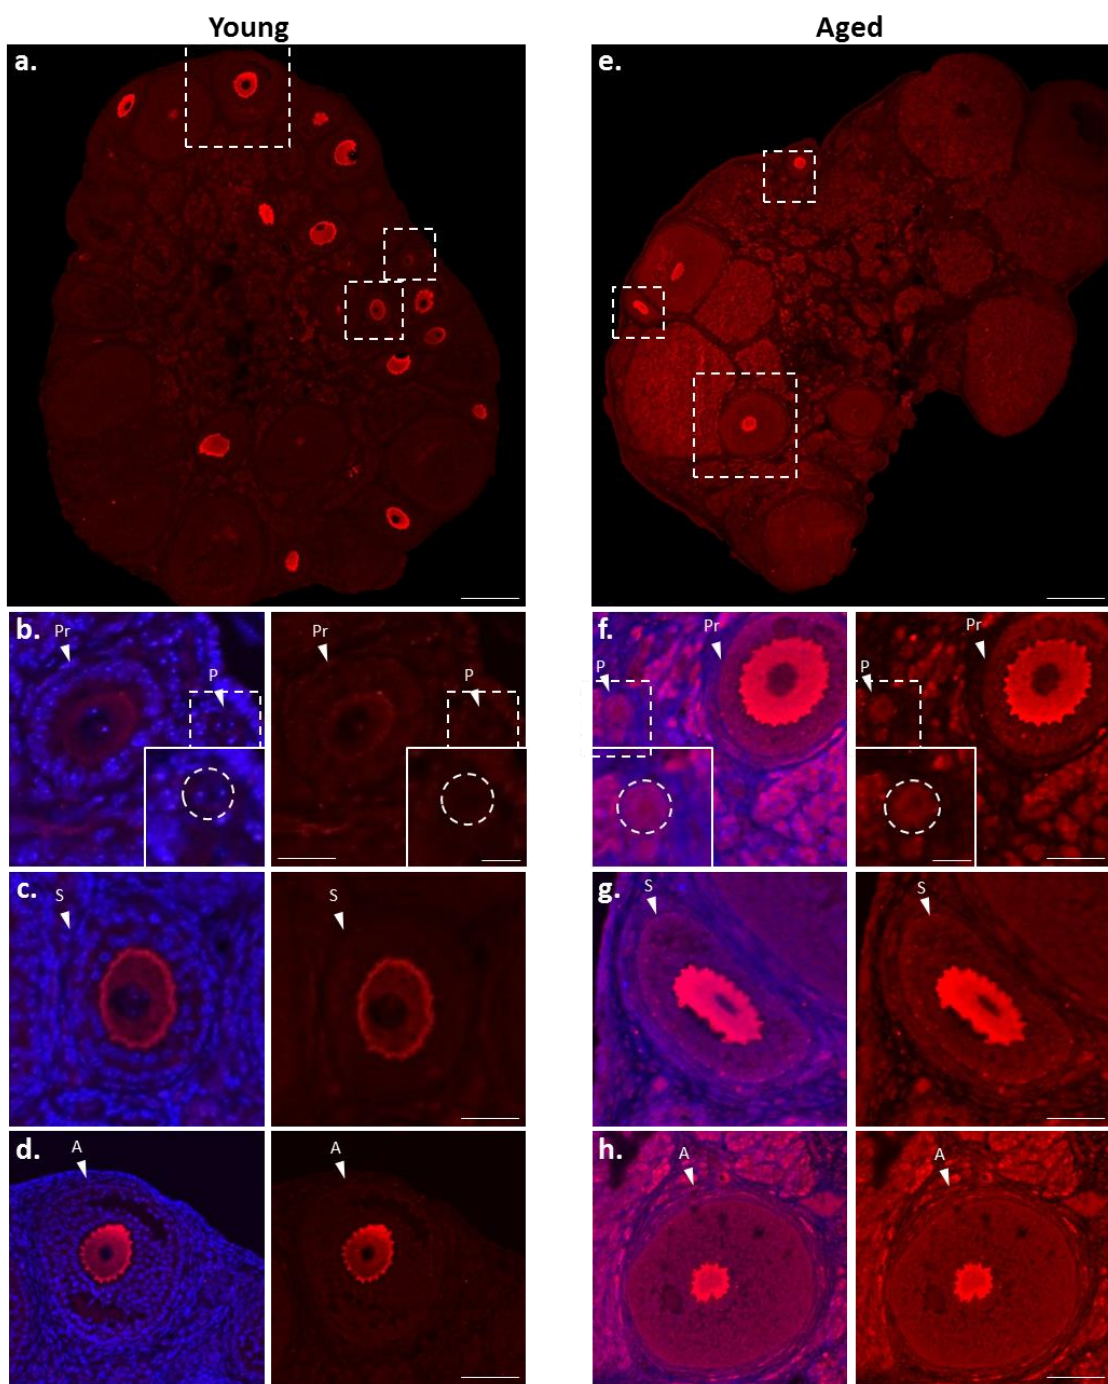

**Fig. S1: 4-HNE is a by-product of lipid peroxidation in the mouse ovary.** The production and localisation of 4-HNE between young (4 to 6 weeks) and aged (14 months) mouse ovaries was determined using immunofluorescence. **(a)** 4-HNE expression (red) was observed at basal levels within all cell types within the young ovary (scale bar = 200  $\mu$ m) including oocytes in **(b)** primordial (P), primary (Pr, scale bar = 20  $\mu$ m), **(c)** secondary (S, scale bar = 40  $\mu$ m) and **(d)** antral follicles (A, scale bar = 80  $\mu$ m). **(e)** 4-HNE generation was also observed in all cell types within the aged ovary (scale bar = 300  $\mu$ m) including oocytes in **(f)** primordial, primary (scale bar = 20  $\mu$ m) **(g)** secondary (scale bar = 40  $\mu$ m) and **(h)** antral follicles (scale bar = 80  $\mu$ m). Nuclei were counterstained with DAPI (blue). Immunofluorescence assays were performed in both technical and biological triplicate.

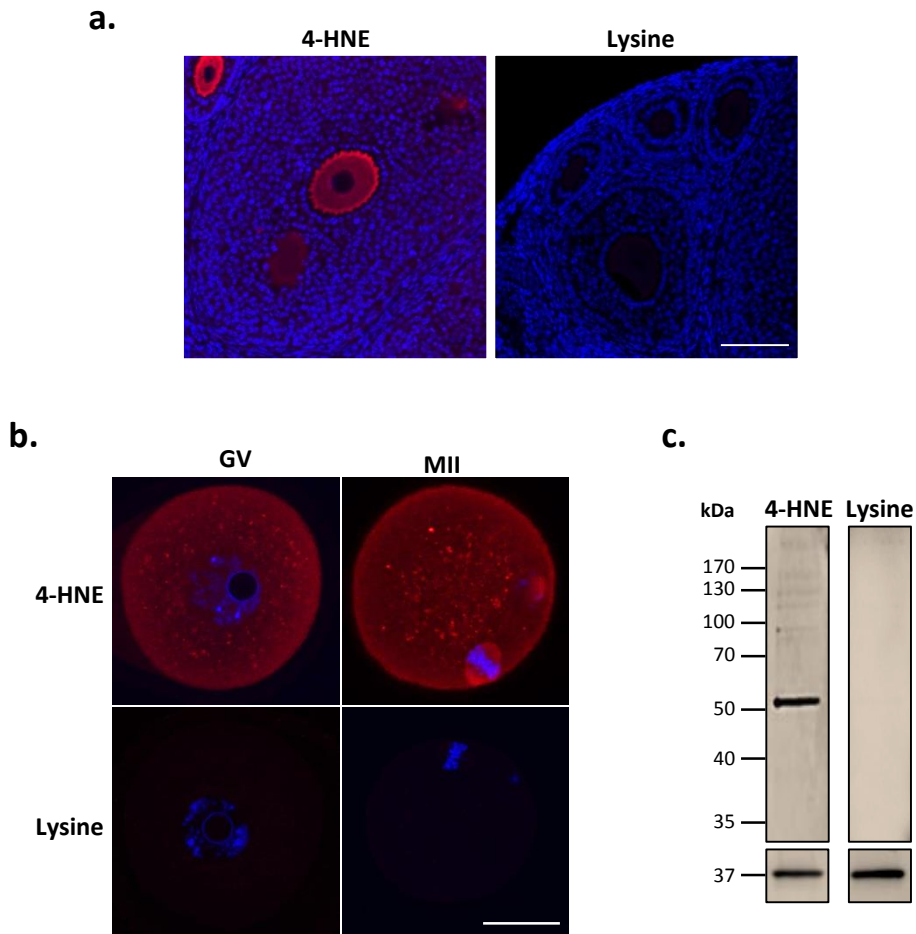

**Fig. S2: 4-HNE antibody specificity.** L-Lysine-4-HNE bound anti-4-HNE antibody controls (lysine) revealed no unspecific primary or secondary antibody binding during **(a)** Immunofluorescence (scale bar = 40  $\mu$ m) or **(b)** immunocytochemistry (scale bar = 20  $\mu$ m) compared to unbound anti-4-HNE antibody (red). Nuclei were counterstained with DAPI (Immunofluorescence) or Hoechst (immunocytochemistry) (blue). Antibody specificity was also confirmed for immunoblotting, which also revealed no unspecific primary or secondary antibody binding in L-Lysine-4-HNE bound anti-4-HNE antibody controls (lysine). Immunoblots were stripped and re-probed with GAPDH as a loading control.

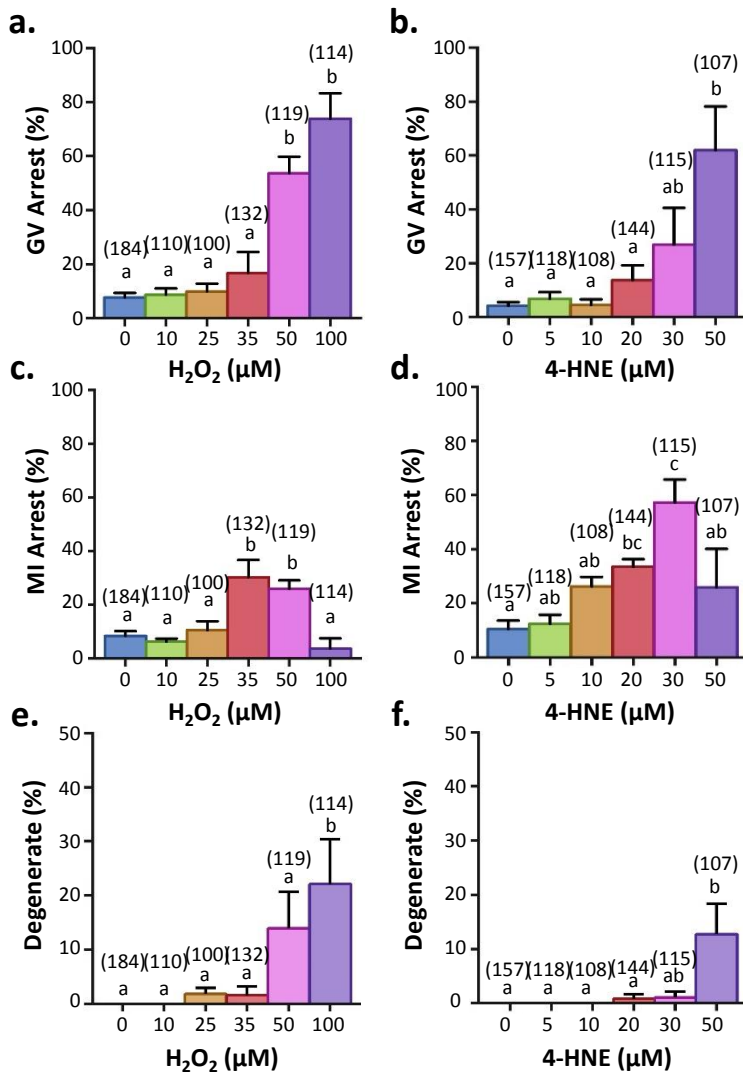

**Fig. S3: Acute exposure to H<sub>2</sub>O<sub>2</sub> and 4-HNE at GV stage causes meiotic arrest and degeneration.** Oocytes at GV stage were treated with either H<sub>2</sub>O<sub>2</sub> for 1 h or 4-HNE for 2 h prior to IVM for 16 h. For the purpose of this analysis, GV oocytes were identified by the presence of a nuclear envelope and nucleolus, MI oocytes by the absence of the nuclear envelope and nucleolus and degenerative oocytes were identified *via* cytoplasmic fragmentation. **(a)** A dose-dependent increase in GV arrest was observed after H<sub>2</sub>O<sub>2</sub> (one-way ANOVA;  $p \leq 0.0011$ ) and **(b)** 4-HNE (one-way ANOVA;  $p \leq 0.0037$ ) treatment. **(c)** A dose-dependent increase following a significant decrease was also observed in MI arrest after H<sub>2</sub>O<sub>2</sub> (one-way ANOVA;  $p \leq 0.0456$ ) and **(d)** 4-HNE (one-way ANOVA;  $p \leq 0.0420$ ) treatment. **(e)** Furthermore, a dose-dependent increase in oocyte degeneration was observed after H<sub>2</sub>O<sub>2</sub> (one-way ANOVA;  $p \leq 0.0037$ ) and **(f)** 4-HNE (one-way ANOVA;  $p \leq 0.0003$ ) treatment. Error bars represent SEM. IVM experiments were performed with a minimum of five replicates with each replicate containing between 20-50 oocytes pooled from a minimum of three animals.

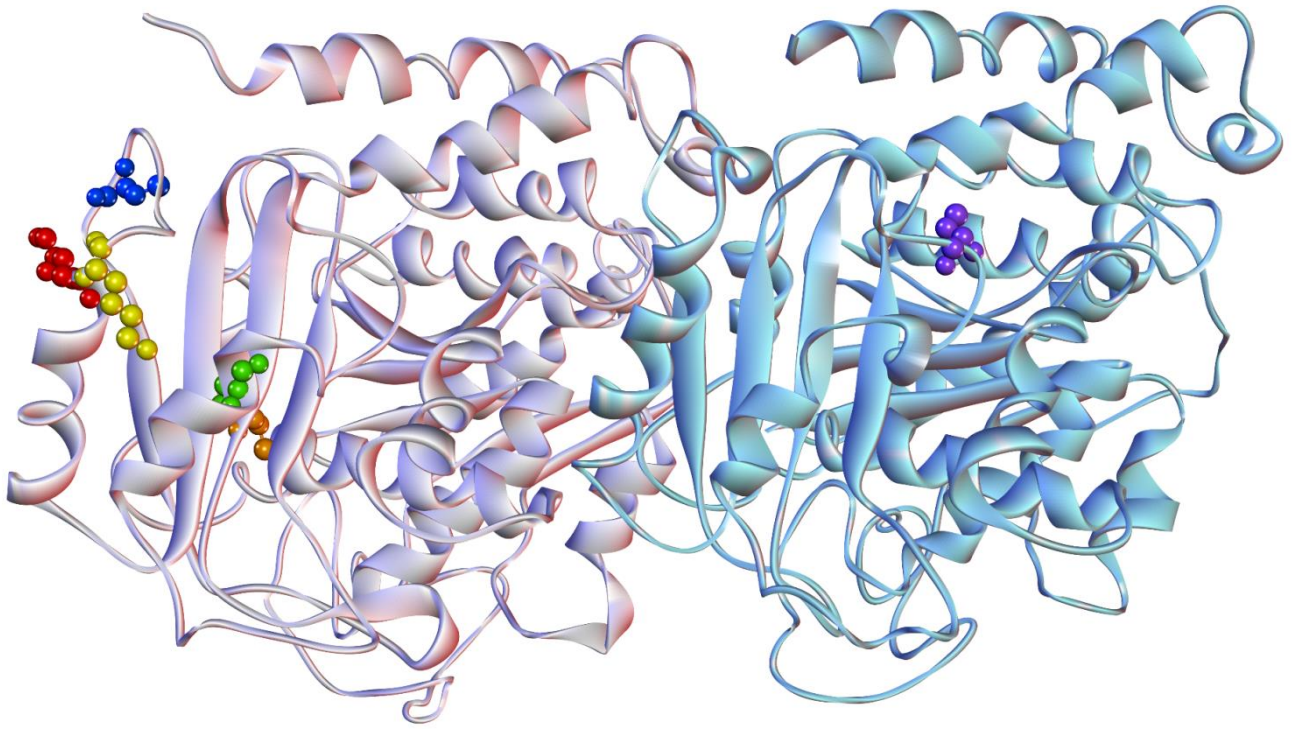

**Fig. S4:  $\alpha$ - and  $\beta$ -tubulin dimer homology model with confirmed 4-HNE modifications.**  $\alpha$ - tubulin (white) 4-HNE modifications have been identified on Cys295 (green), Lys336 (red), Lys338 (yellow), Cys347 (blue) and Cys376 (orange) as well as on  $\beta$ -tubulin (blue) on Cys303 (purple)<sup>46,62,63</sup>.



**Table S1: LC–MS/MS protein identification (ID) of the predominant 55 kDa protein(s) targeted for adduction by 4-HNE.**

| Protein ID (gene symbol) | Mascot score | MW [kDa] | No. Peptides |
|--------------------------|--------------|----------|--------------|
| Actin (ACTB)             | 152.1        | 41.7     | 3            |
| Tubulin alpha (TBA3)     | 81.1         | 49.9     | 2            |
| Tubulin beta (TBB4A)     | 78.1         | 49.9     | 2            |

**Table S2: Antibodies used for immunocytochemistry (ICC), immunofluorescence (IF), proximity ligation assays (PLA), immunoprecipitation (IP) and immunoblotting (IB).**

| Antibody          | Species           | Concentration | Dilution/<br>concentration        | Source and Cat#                     |
|-------------------|-------------------|---------------|-----------------------------------|-------------------------------------|
| 4-HNE             | Rabbit polyclonal | 1 mg/ ml      | 1:50 (IF, ICC, PLA)<br>1:500 (IB) | Cat # HNE11-S,<br>Jomar Diagnostics |
| 4-HNE             | Mouse monoclonal  | 0.1 mg/ ml    | 1:50 (IB)                         | Cat # ab48506,<br>Abcam             |
| $\alpha$ -tubulin | Mouse monoclonal  | 1 mg/ ml      | 1:400 (ICC, PLA)                  | Cat # A11126<br>ThermoFisher        |
| $\alpha$ -tubulin | Rabbit monoclonal | 1 mg/ ml      | 10 $\mu$ g (IP)                   | Cat # ab52866,<br>Abcam             |
| $\alpha$ -tubulin | Mouse monoclonal  | 6 mg/ ml      | 1:2000 (IB)                       | Cat # T5168,<br>Sigma-Aldrich       |
| $\beta$ -tubulin  | Rabbit polyclonal | 1 mg/ ml      | 10 $\mu$ g (IP)                   | Cat # ab6046,<br>Abcam              |
| $\beta$ -tubulin  | Mouse monoclonal  | 0.2 mg/ ml    | 1:100 (ICC, PLA)<br>1:500 (IB)    | Cat# sczsc-5274,<br>Santa Cruz      |
| $\gamma$ -tubulin | Rabbit polyclonal | 0.6 mg/ ml    | 10 $\mu$ g (IP)                   | Cat # ab84355,<br>Abcam             |
| $\gamma$ -tubulin | Mouse monoclonal  | 5 mg/ ml      | 1:1000 (ICC, PLA)<br>1:5000 (IB)  | Cat # T6557,<br>Sigma-Aldrich       |
| CREST             | Human monoclonal  | 1 mg/ ml      | 1:400 (ICC)                       | Cat # 90C-CS1058,<br>Fitzgerald     |
| GAPDH             | Rabbit polyclonal | 5 mg/ ml      | 1:5000 (IB)                       | Cat # G9545,<br>Sigma-Aldrich       |
